# Supplementary material for: New picolinate-functionalized titanium-oxide clusters: syntheses, structures and photocatalytic H2 evolution
Source: Royal Society of Chemistry journal article supplement (doi:10.1039/d2dt01882a), 2022-01-01
Supplement: d2dt01882a1.pdf [file d2dt01882a1.pdf]

Supporting Information

## **New Picolinate-Functionalized Titanium-Oxide Clusters: Syntheses, Structure and Photocatalytic H<sub>2</sub> Evolution**

Chang Gao,<sup>a</sup> Dexin Wang,<sup>a</sup> Yanshu Liu,<sup>a</sup> Guanyun Zhang,<sup>a</sup> Caiyun Liu,<sup>a</sup> Amir Said,<sup>a</sup> Huihui Niu,<sup>a</sup> Guo Wang,<sup>b</sup> Chen-Ho Tung,<sup>a</sup> and Yifeng Wang<sup>ac\*</sup>

<sup>a</sup>*Key Lab for Colloid and Interface Science of Ministry of Education, School of Chemistry and Chemical Engineering, Shandong University, Jinan 250100, China*

<sup>b</sup>*Department of Chemistry, Capital Normal University, Beijing 100048, China*

<sup>c</sup>*State Key Laboratory of Crystal Materials, Shandong University, Jinan 250100, China*

Corresponding author email: [yifeng@sdu.edu.cn](mailto:yifeng@sdu.edu.cn)

## S1. The table of crystallographic data

| Compound                                     | <b>1</b>                                                                                                                                                                           | <b>2</b>                                                                                                                                                                         |
|----------------------------------------------|------------------------------------------------------------------------------------------------------------------------------------------------------------------------------------|----------------------------------------------------------------------------------------------------------------------------------------------------------------------------------|
| Formula unit                                 | Ti <sub>12</sub> O <sub>52</sub> N <sub>25</sub> C <sub>130</sub> H <sub>151</sub>                                                                                                 | Ti <sub>12</sub> O <sub>57</sub> N <sub>27</sub> C <sub>132</sub> H <sub>135</sub>                                                                                               |
| CCDC number                                  | 2164406                                                                                                                                                                            | 2164407                                                                                                                                                                          |
| Moieties                                     | [Ti <sub>12</sub> O <sub>18</sub> (O <sub>2</sub> NC <sub>6</sub> H <sub>4</sub> ) <sub>16</sub> ]·4(NC <sub>4</sub> H <sub>12</sub> )·4(CH <sub>3</sub> CN)·2(HO <sup>t</sup> Pr) | [Ti <sub>12</sub> O <sub>18</sub> (O <sub>2</sub> NC <sub>6</sub> H <sub>4</sub> ) <sub>18</sub> ]·3(H <sub>3</sub> O)·3(NC <sub>4</sub> H <sub>12</sub> )·6(CH <sub>3</sub> CN) |
| Formula weight (g/mol)                       | 3470.13                                                                                                                                                                            | 3586.03.9                                                                                                                                                                        |
| Crystal system                               | monoclinic                                                                                                                                                                         | monoclinic                                                                                                                                                                       |
| Space group (Nr.)                            | <i>P2<sub>1</sub>/c</i>                                                                                                                                                            | <i>C2/c</i>                                                                                                                                                                      |
| a (Å)                                        | 17.8911(4)                                                                                                                                                                         | 32.8178(7)                                                                                                                                                                       |
| b (Å)                                        | 14.9531(4)                                                                                                                                                                         | 15.2483(3)                                                                                                                                                                       |
| c (Å)                                        | 28.9581(6)                                                                                                                                                                         | 32.1138(8)                                                                                                                                                                       |
| α (°)                                        | 90                                                                                                                                                                                 | 90                                                                                                                                                                               |
| β (°)                                        | 98.617(2)                                                                                                                                                                          | 114.021(3)                                                                                                                                                                       |
| γ (°)                                        | 90                                                                                                                                                                                 | 90                                                                                                                                                                               |
| Volume (Å <sup>3</sup> )                     | 7659.7(6)                                                                                                                                                                          | 14678.5(6)                                                                                                                                                                       |
| Z                                            | 2                                                                                                                                                                                  | 4                                                                                                                                                                                |
| Density <sub>calc</sub> (g/cm <sup>3</sup> ) | 1.505                                                                                                                                                                              | 1.476                                                                                                                                                                            |
| Abs. Coeff. μ (mm <sup>-1</sup> )            | 5.815                                                                                                                                                                              | 6.052                                                                                                                                                                            |
| Temperature (K)                              | 173                                                                                                                                                                                | 173                                                                                                                                                                              |
| Total reflections                            | 50920                                                                                                                                                                              | 44649                                                                                                                                                                            |
| Min-max 2θ (°)                               | 6.174 to 154.34                                                                                                                                                                    | 6.026 to 153.088                                                                                                                                                                 |
| Unique reflections                           | 15222                                                                                                                                                                              | 14543                                                                                                                                                                            |
| R <sub>1</sub> [I ≥ 2σ]                      | 0.0782                                                                                                                                                                             | 0.1138                                                                                                                                                                           |
| wR <sub>2</sub> (all data)                   | 0.2230                                                                                                                                                                             | 0.3215                                                                                                                                                                           |
| R <sub>int</sub>                             | 0.0795                                                                                                                                                                             | 0.0792                                                                                                                                                                           |
| Goodness of fit on F <sup>2</sup>            | 1.055                                                                                                                                                                              | 1.102                                                                                                                                                                            |
| Parameters                                   | 1020                                                                                                                                                                               | 927                                                                                                                                                                              |
| Restraints                                   | 330                                                                                                                                                                                | 277                                                                                                                                                                              |
| Largest diff. peak/hole (e Å <sup>-3</sup> ) | 1.07/-0.71                                                                                                                                                                         | 1.35/-1.22                                                                                                                                                                       |

S2. Supplementary figures and discussion

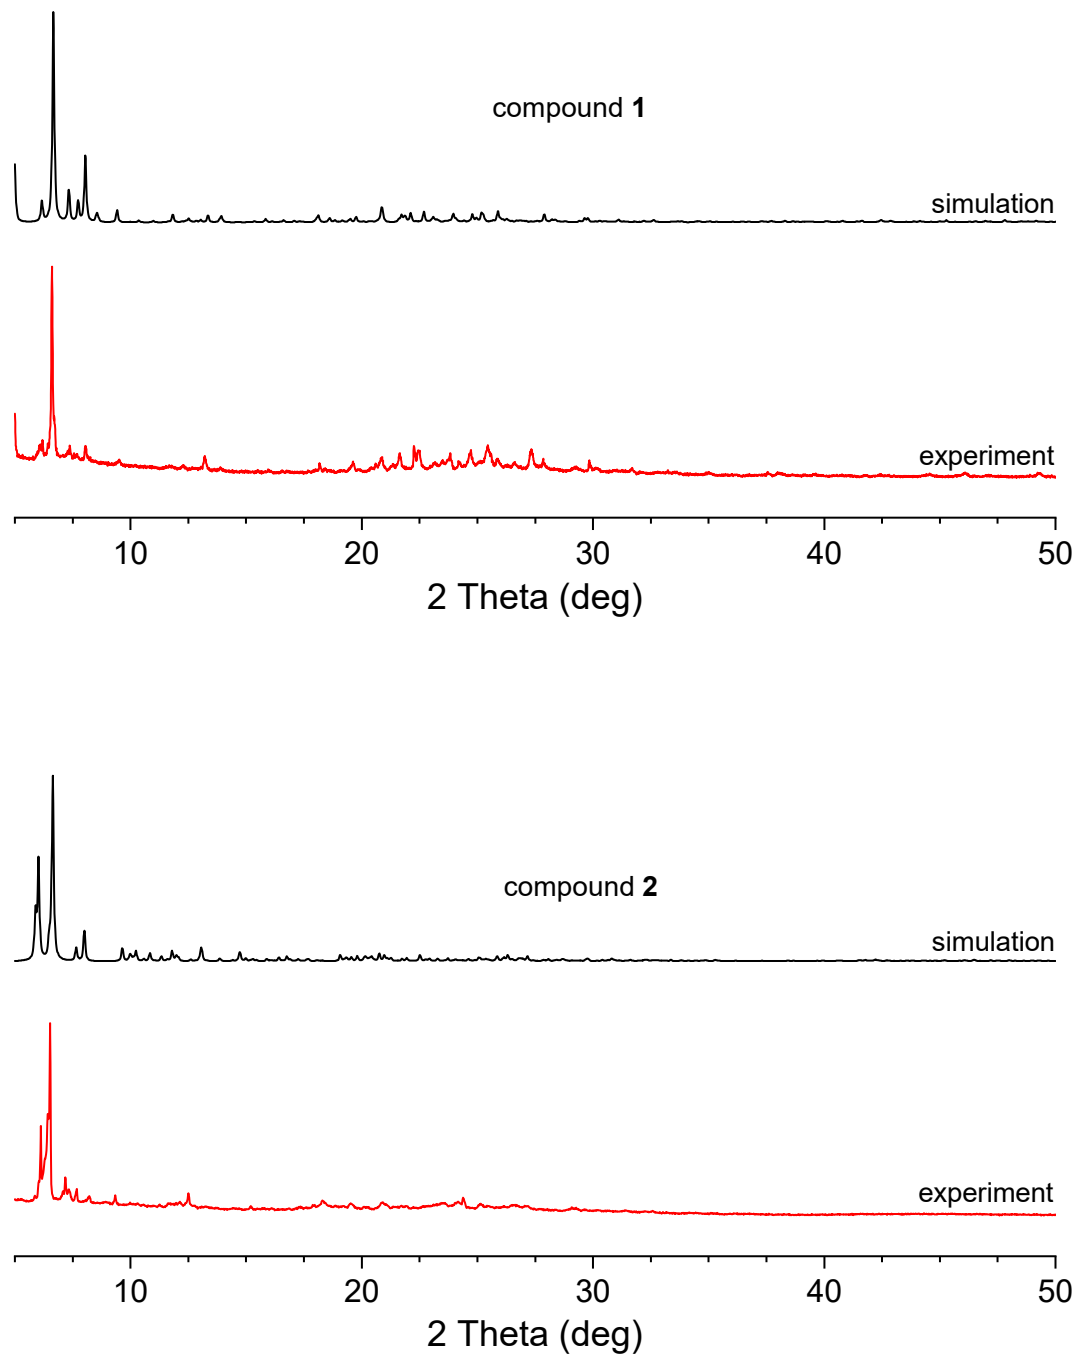

**Figure S1.** Powder X-ray diffraction pattern of **1** and **2**, recorded on a Rigaku SmartLab 9KW X-ray diffraction instrument.

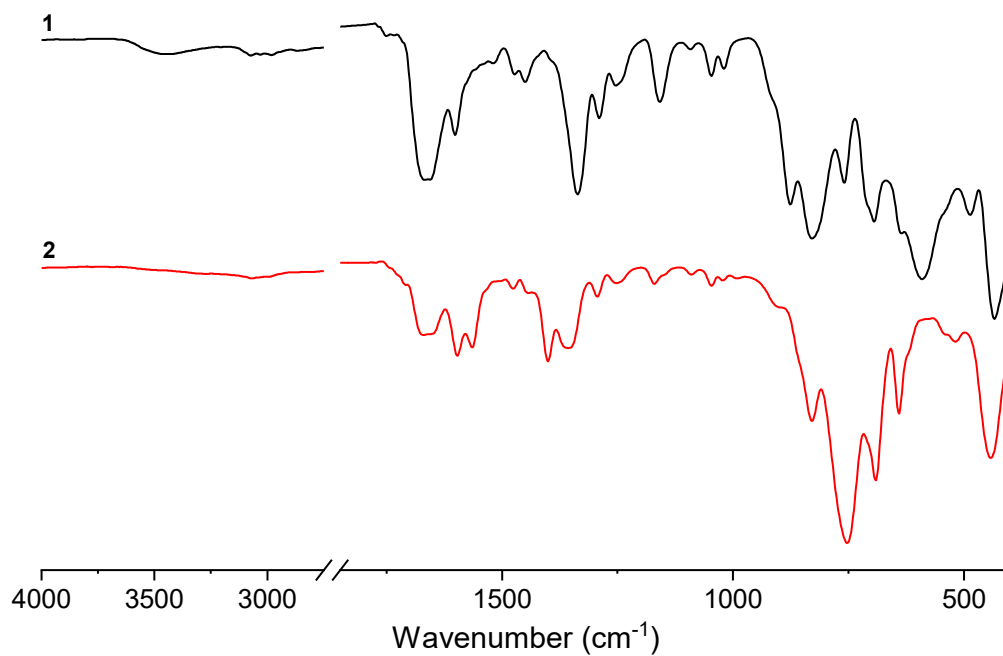

**Figure S2.** FTIR spectra of **1** and **2**.

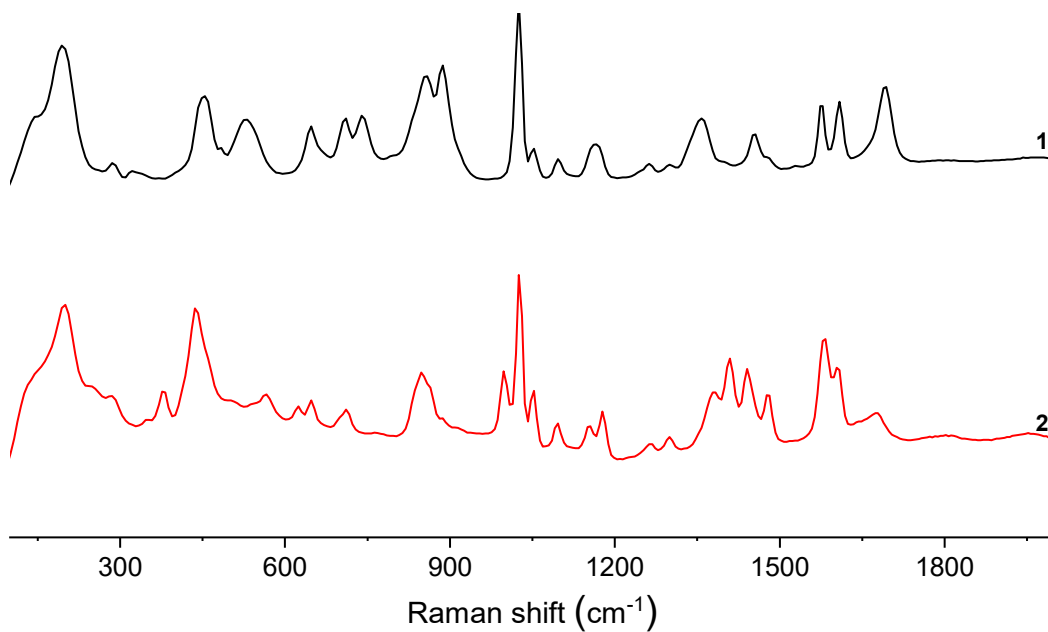

**Figure S3.** Raman spectra of **1** and **2**.

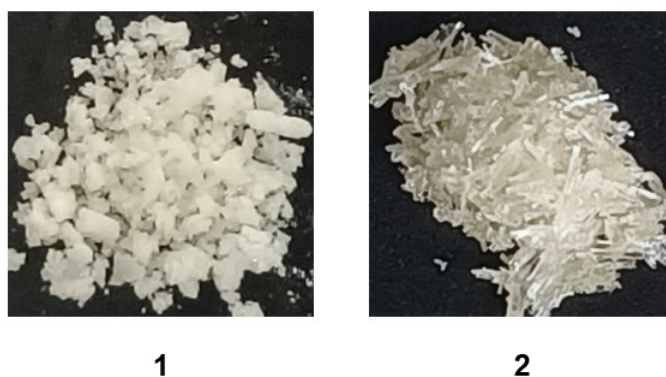

**Figure S4.** The photos of of **1** and **2**.

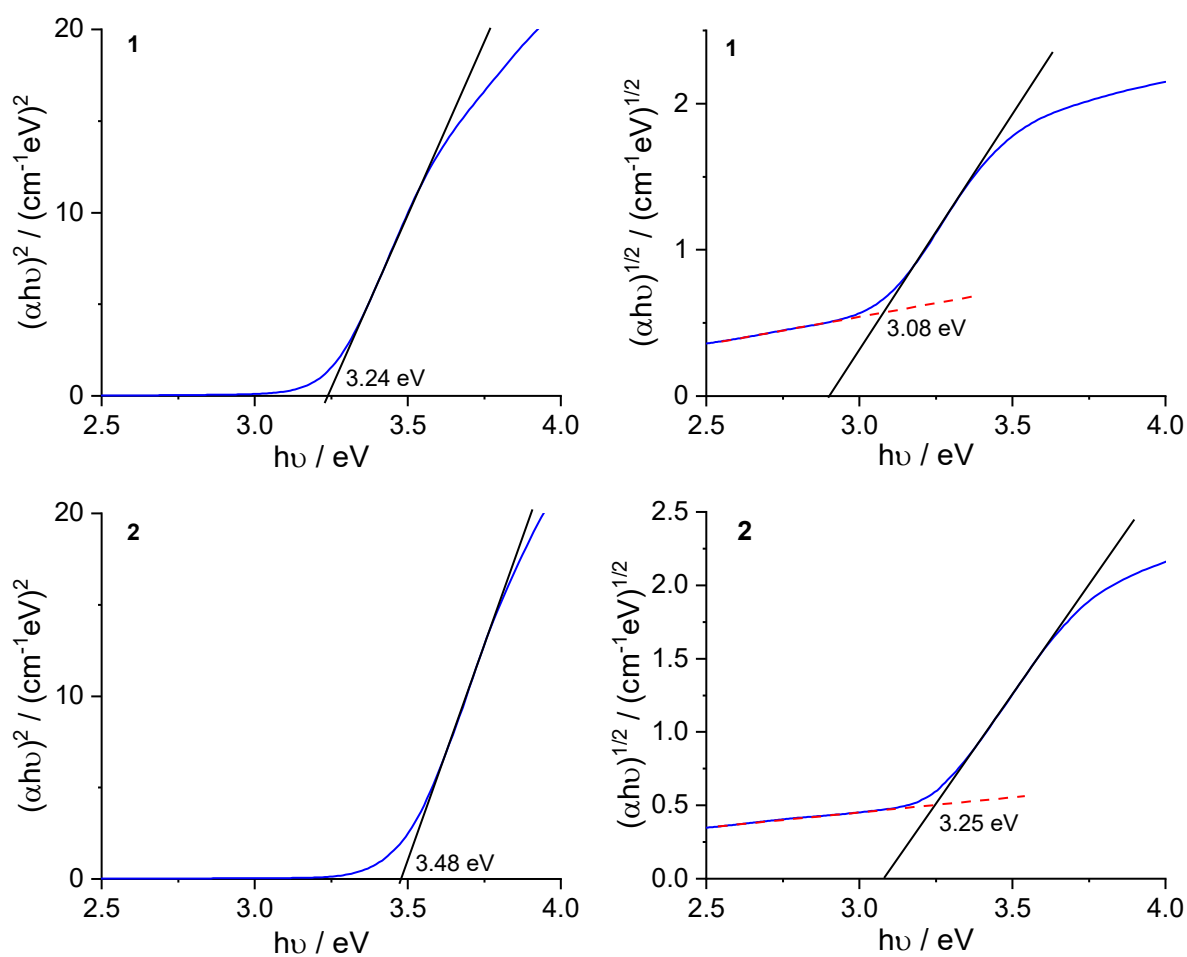

**Figure S5.** Calculations of direct band gap and indirect band gap values based on UV-vis diffuse reflectance spectra.

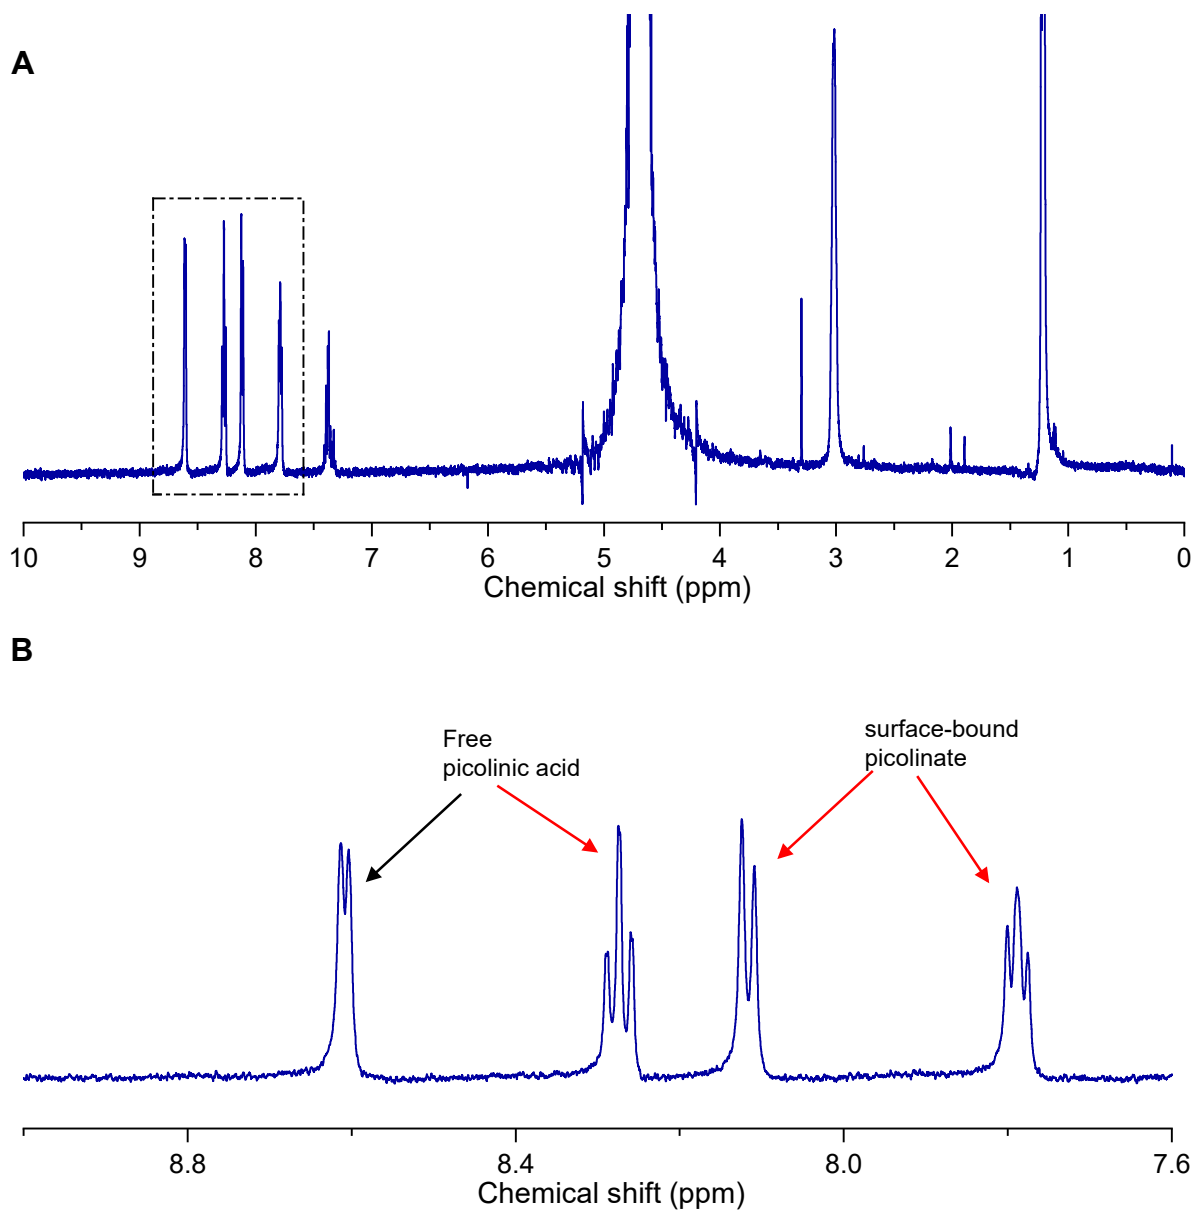

**Figure S6.**  $^1\text{H}$  NMR of **1**-Pt solution prepared using  $\text{D}_2\text{O}$ . Panel B is the magnified spectra of panel A. The spectrum implies approximately 50% of PA ligands desorb from the surfaces of **1a** in aqueous solution.

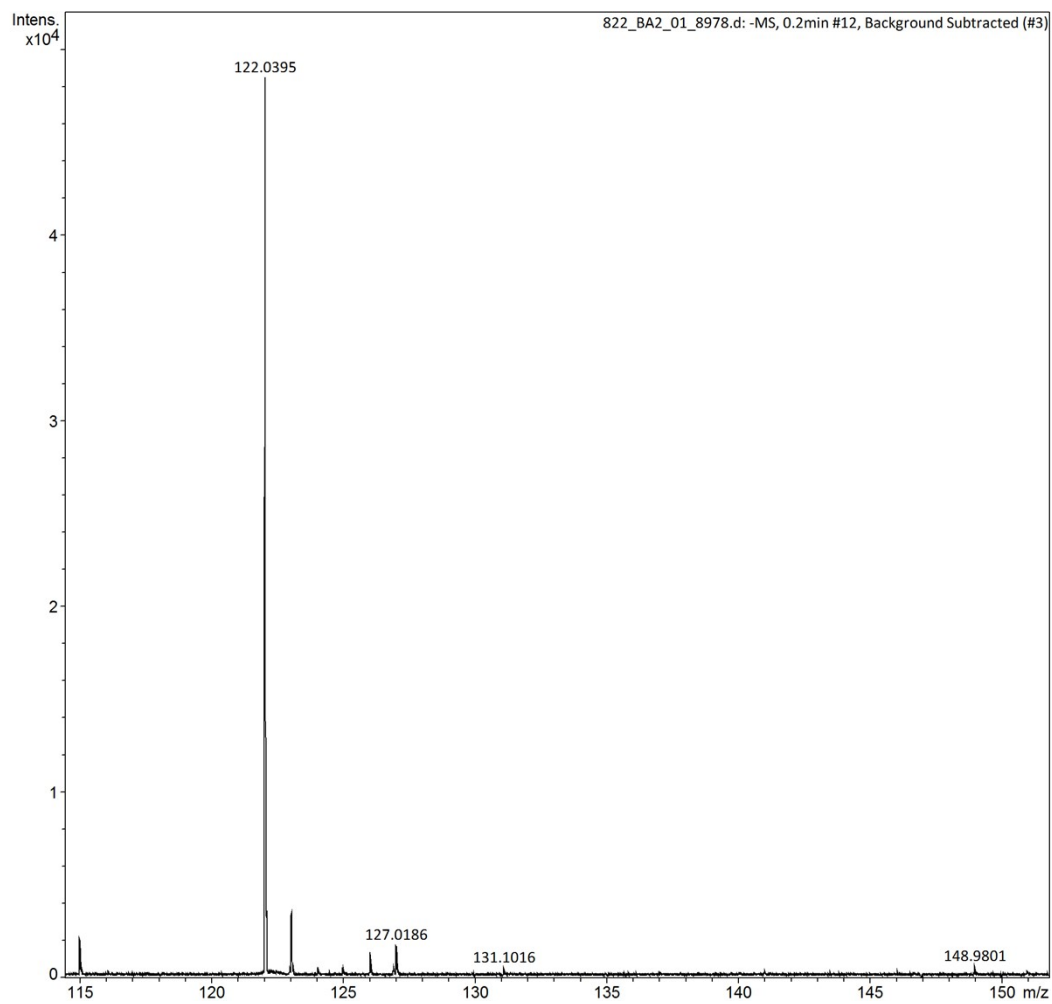

**Figure S7.** The high-resolution ESI-MS spectrum of the 1-Pt solution. The spectrum was obtained using an Agilent Q-TOF 6510 instrument in negative mode.

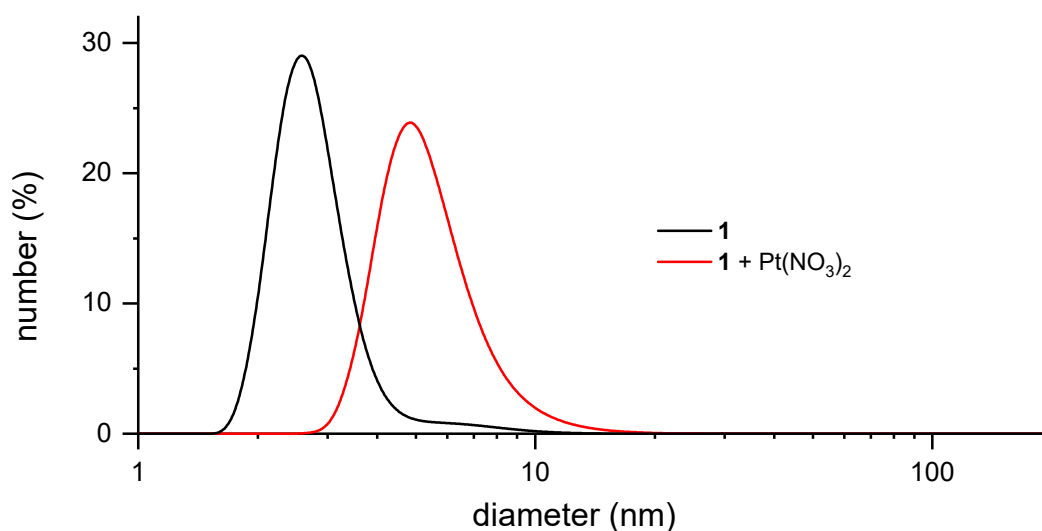

**Figure S8.** DLS profiles of the various solution samples.

### Estimation of apparent quantum efficiency (AQY)

To calculate the AQY value, we assume that all UV photons reaching the solution were absorbed. Hence, the number of photons,  $N$ , can be calculated using the following equation:

$$N = \frac{\text{photon intensity} \times \text{reaction cross section} \times \text{reaction time}}{hC / \lambda}$$

in which,  $h$  is the Plank constant,  $C$  is the velocity of light and  $\lambda$  is the wavelength, respectively. The UV intensity of the 300 W Xenon lamp was  $3.6 \text{ mW cm}^{-2}$  and the effective irradiated area was ca.  $12 \text{ cm}^2$ . To simplify the calculations, 380 nm was used as the average wavelength of UV.

$$N = \frac{3.6 \times 10^{-3} \times 12 \times 3600}{6.626 \times 10^{-34} \times \frac{3.0 \times 10^8}{380 \times 10^{-9}}} \div (6.022 \times 10^{23}) = 4.9 \times 10^{-4} (\text{mol h}^{-1})$$

The AQY is then calculated using the following equation. The actual reaction of the catalyst is 50 mg, and the yield of  $\text{H}_2$  for **1** and **2** is 9 and  $1.16 \mu\text{mol h}^{-1}$ , respectively.

$$\text{AQY} = \frac{\text{the amount of H}_2 \times 2}{N} \times 100\%$$

The AQY of **1** and **2** for  $\text{H}_2$  evolution are 3.6% and 0.47%, respectively.



**Table S1.** H<sub>2</sub> evolution experiment data of some TOCs.

| TOC                                                                                                                                                                                           | light source         | solution medium             | Pt (wt%) to Ti | rate (μmol h <sup>-1</sup> g <sup>-1</sup> ) | ref                                                                   |
|-----------------------------------------------------------------------------------------------------------------------------------------------------------------------------------------------|----------------------|-----------------------------|----------------|----------------------------------------------|-----------------------------------------------------------------------|
| Ti <sub>52</sub> O <sub>72</sub> (OH) <sub>2</sub> (pa) <sub>34</sub> (O <sup>i</sup> Pr) <sub>28</sub>                                                                                       | 300-W Xe lamp        | H <sub>2</sub> O, MeOH      | ~1.64          | 398                                          | Fang, W.-H., et. al. <i>J. Am. Chem. Soc.</i> <b>2016</b> , 138, 7480 |
| Ti <sub>6</sub> O <sub>6</sub> (pa) <sub>6</sub> (O <sup>i</sup> Pr) <sub>6</sub>                                                                                                             | 300-W Xe lamp        | H <sub>2</sub> O, MeOH      | ~0.66          | 268                                          | Fang, W. H., et. al. <i>Dalton Trans.</i> <b>2017</b> , 46, 803       |
| Ti <sub>14</sub> O <sub>19</sub> (phn) <sub>8</sub> (Ac) <sub>12</sub> (O <sup>i</sup> Pr) <sub>2</sub>                                                                                       | 300-W Xe lamp        | H <sub>2</sub> O, MeOH      | 0              | 236                                          | Hong, Z.-F., et. al. <i>Cryst. Growth Des.</i> <b>2018</b> , 18, 4864 |
| [Ti <sub>6</sub> O <sub>6</sub> (pp) <sub>2</sub> (PhO) <sub>6</sub> (phn) <sub>6</sub> ]Cl <sub>2</sub>                                                                                      | 300-W Xe lamp        | H <sub>2</sub> O, TEOA      | ~0.66          | ~217                                         | Narayanam, N., et. al. <i>Chem. Commun.</i> <b>2017</b> , 53, 8078    |
| Ti <sub>6</sub> O <sub>4</sub> (BDC) <sub>2</sub> (pa) <sub>2</sub> (O <sup>i</sup> Pr) <sub>10</sub>                                                                                         | 300-W Xe lamp        | H <sub>2</sub> O, MeOH      | ~1.64          | 206                                          | Fang, W.-H., et. al. <i>J. Am. Chem. Soc.</i> <b>2016</b> , 138, 7480 |
| <b>1</b>                                                                                                                                                                                      | <b>300-W Xe lamp</b> | <b>H<sub>2</sub>O, MeOH</b> | <b>0.5</b>     | <b>180</b>                                   | <b>this study</b>                                                     |
| Ti <sub>6</sub> O <sub>4</sub> (Cec) <sub>4</sub> (O <sup>i</sup> Pr) <sub>12</sub>                                                                                                           | 300-W Xe lamp        | H <sub>2</sub> O, MeOH      | ~0.33          | 109                                          | Gao, M.-Y., et. al. <i>Dalton Trans.</i> <b>2017</b> , 46, 10630      |
| [Ti <sub>28</sub> O <sub>48</sub> (PhO) <sub>14</sub> (phn) <sub>14</sub> ]Cl <sub>2</sub>                                                                                                    | 300-W Xe lamp        | H <sub>2</sub> O, TEOA      | ~0.66          | ~100                                         | Narayanam, N., et. al. <i>Chem. Commun.</i> <b>2017</b> , 53, 8078    |
| Ti <sub>6</sub> O <sub>2</sub> (pp) <sub>4</sub> (PhO) <sub>6</sub> (O <sup>i</sup> Pr) <sub>6</sub>                                                                                          | 300-W Xe lamp        | H <sub>2</sub> O, TEOA      | ~0.66          | ~77                                          | Narayanam, N., et. al. <i>Chem. Commun.</i> <b>2017</b> , 53, 8078    |
| H <sub>2</sub> [Ti <sub>18</sub> O <sub>25</sub> (Cec) <sub>20</sub> (O <sup>i</sup> Pr) <sub>4</sub> ]                                                                                       | 300-W Xe lamp        | H <sub>2</sub> O, MeOH      | ~0.33          | 74                                           | Gao, M.-Y., et. al. <i>Dalton Trans.</i> <b>2017</b> , 46, 10630      |
| H <sub>2</sub> [Ti <sub>4</sub> Cd <sub>2</sub> O <sub>4</sub> (Pa) <sub>12</sub> (O <sup>i</sup> Pr) <sub>2</sub> ]                                                                          | 300-W Xe lamp        | H <sub>2</sub> O, MeOH      | ~0.66          | 63                                           | Liu, J., et. al. <i>Dalton Trans.</i> <b>2016</b> , 45, 4501          |
| [Ti <sub>6</sub> O <sub>6</sub> (pp) <sub>2</sub> (PhO) <sub>6</sub> (bpy) <sub>6</sub> ]Cl <sub>2</sub>                                                                                      | 300-W Xe lamp        | H <sub>2</sub> O, TEOA      | ~0.66          | ~60                                          | Narayanam, N., et. al. <i>Chem. Commun.</i> <b>2017</b> , 53, 8078    |
| [Ti <sub>4</sub> O(PPA) <sub>3</sub> (O <sup>i</sup> Pr) <sub>8</sub> ] <sub>2</sub> [Ti <sub>6</sub> O <sub>4</sub> (PPA) <sub>2</sub> (O <sup>i</sup> Pr) <sub>10</sub> ](ANA) <sub>2</sub> | 300-W Xe lamp        | H <sub>2</sub> O, MeOH      | ~0.33          | 42.8                                         | Gao, M.-Y., et. al. <i>Cryst. Growth Des.</i> <b>2017</b> , 17, 3592  |
| <b>2</b>                                                                                                                                                                                      | <b>300-W Xe lamp</b> | <b>H<sub>2</sub>O, MeOH</b> | <b>0.5</b>     | <b>23.1</b>                                  | <b>this study</b>                                                     |
| [Ti <sub>4</sub> O(PPA) <sub>3</sub> (O <sup>i</sup> Pr) <sub>8</sub> ] <sub>2</sub> (PIP)                                                                                                    | 300-W Xe lamp        | H <sub>2</sub> O, MeOH      | ~0.33          | ~8                                           | Gao, M.-Y., et. al. <i>Cryst. Growth Des.</i> <b>2017</b> , 17, 3592  |
| [Ti <sub>4</sub> O(PPA) <sub>3</sub> (O <sup>i</sup> Pr) <sub>8</sub> ] <sub>2</sub> (APZ)                                                                                                    | 300-W Xe lamp        | H <sub>2</sub> O, MeOH      | ~0.33          | ~7                                           | Gao, M.-Y., et. al. <i>Cryst. Growth Des.</i> <b>2017</b> , 17, 3592  |
| [Ti <sub>4</sub> O(PPA) <sub>3</sub> (O <sup>i</sup> Pr) <sub>8</sub> ] <sub>2</sub> (ADN)                                                                                                    | 300-W Xe lamp        | H <sub>2</sub> O, MeOH      | ~0.33          | ~4                                           | Gao, M.-Y., et. al. <i>Cryst. Growth Des.</i> <b>2017</b> , 17, 3592  |
| H <sub>2</sub> [Ti <sub>18</sub> O <sub>20</sub> (pp) <sub>2</sub> (pa) <sub>16</sub> (O <sup>i</sup> Pr) <sub>14</sub> ]                                                                     | 300-W Xe lamp        | H <sub>2</sub> O, MeOH      | ~0.66          | ~3                                           | Fang, W. H., et. al. <i>Dalton Trans.</i> <b>2017</b> , 46, 803       |

O<sup>i</sup>Pr = isopropoxide; BDC = 1,2-benzenedicarboxylate; Hpa = propionic acid; HPA = pivalic acid; pp = phenyl phosphonate; PhOH = phenol; phn = 1,10-phenanthroline; bpy = 2,20-bipyridyl; PIP = piperazine; AND = adenine; APZ = aminopyrazine; ANA = 2-aminoisonicotinic acid; HCec = cyclohex-3-ene-1-carboxylate; Ac = acetate; LF = 3-fluorosalicic acid; TEOA = triethanol amine.
